# Supplementary material for: The adaptive immune and immune checkpoint landscape of neoadjuvant treated esophageal adenocarcinoma using digital pathology quantitation
Source: PubMed Central journal article supplement (PMC7268770; doi:10.1186/s12885-020-06987-y), 2020-06-01
Supplement: 12885_2020_6987_MOESM4_ESM.pdf [file 12885_2020_6987_MOESM4_ESM.pdf]

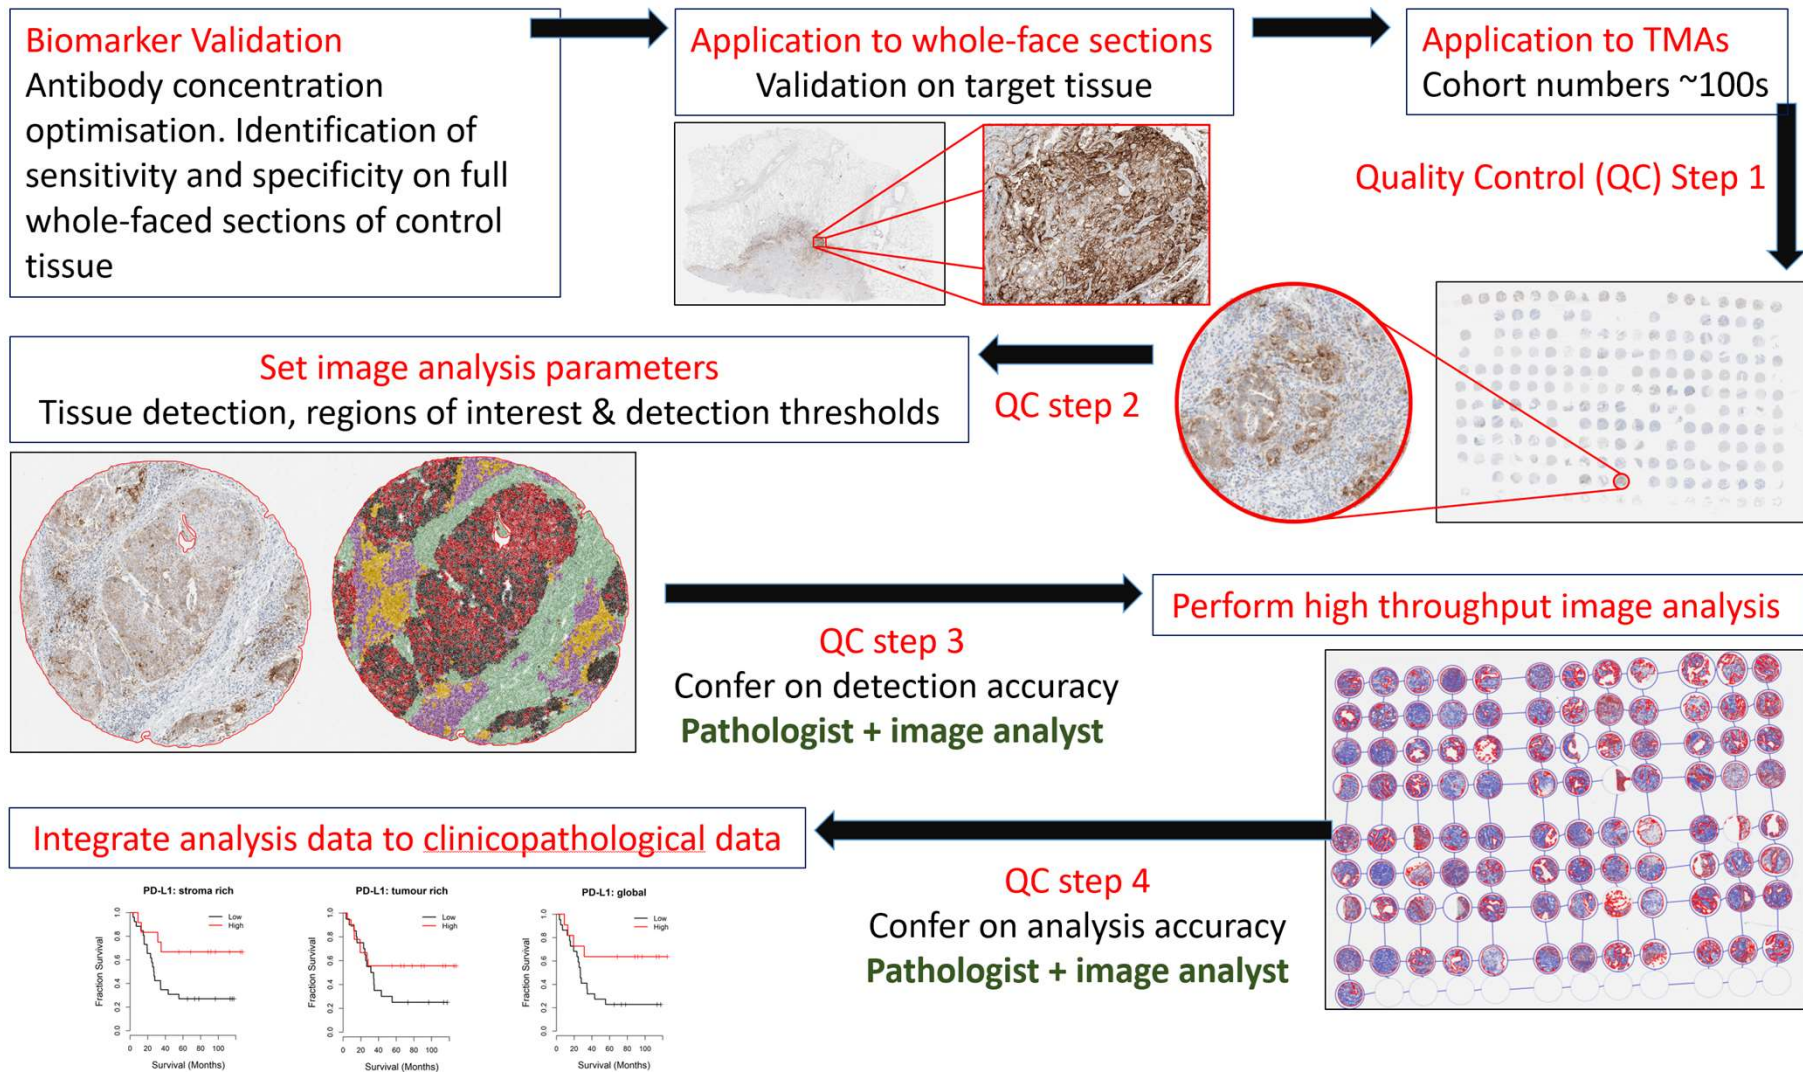

Figure S1. Robust digital pathology workflow. Flow diagram demonstrates conceptually the process of biomarker quantification, strict quality control and data validation steps.
